# Supplementary material for: CRB3 and NF2 orchestrate cytoskeletal dynamics to control epithelial barrier assembly
Source: JCI journal article supplement (doi:10.1172/jci.insight.196350), 2025-10-21
Supplement: sd2 [file 2]

# Full unedited blot for Figure 2b

Confluent  
2D colonoids

Sub-confluent  
2D colonoids

Confluent  
2D colonoids

Sub-confluent  
2D colonoids

Confluent  
2D colonoids

Sub-confluent  
2D colonoids

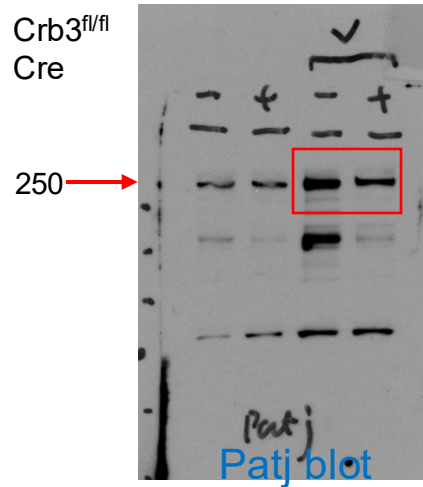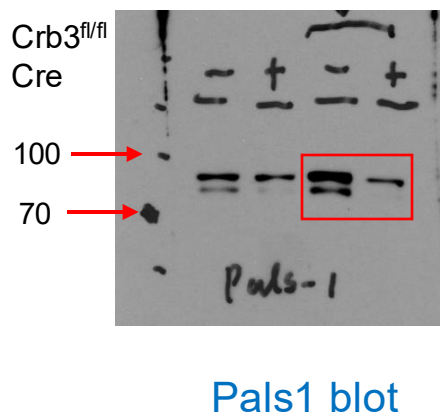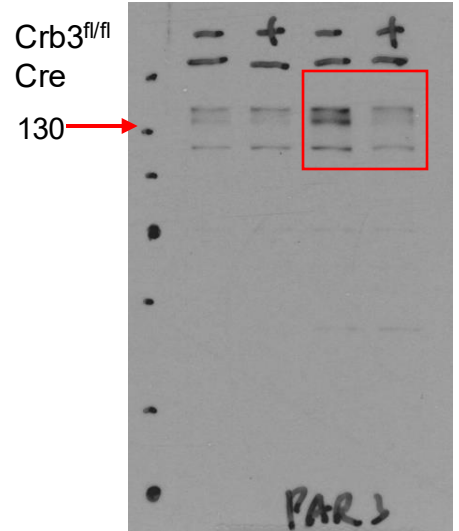

Confluent  
2D colonoids

Sub-confluent  
2D colonoids

Confluent  
2D colonoids

Sub-confluent  
2D colonoids

Par3 blot

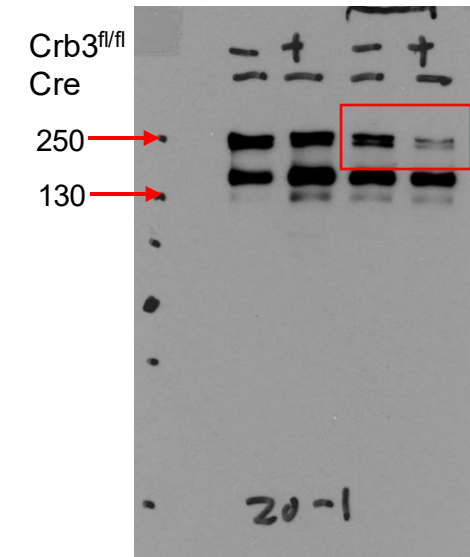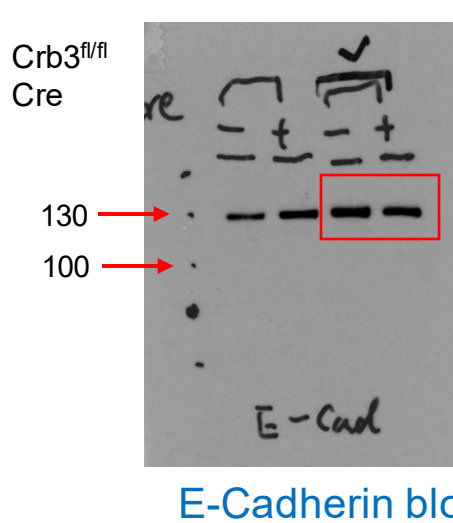

Confluent  
2D colonoids

Sub-confluent  
2D colonoids

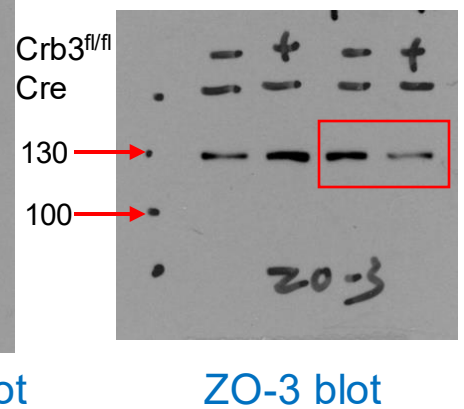

Confluent  
2D colonoids

Sub-confluent  
2D colonoids

Confluent  
2D colonoids

Sub-confluent  
2D colonoids

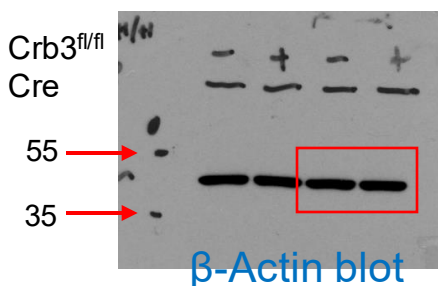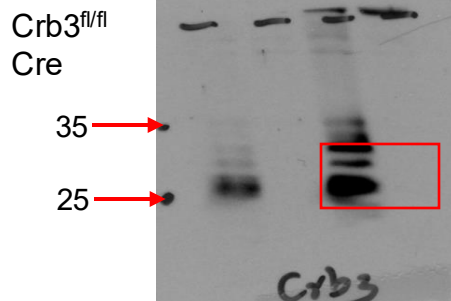

# Full unedited blot for Figure 7b

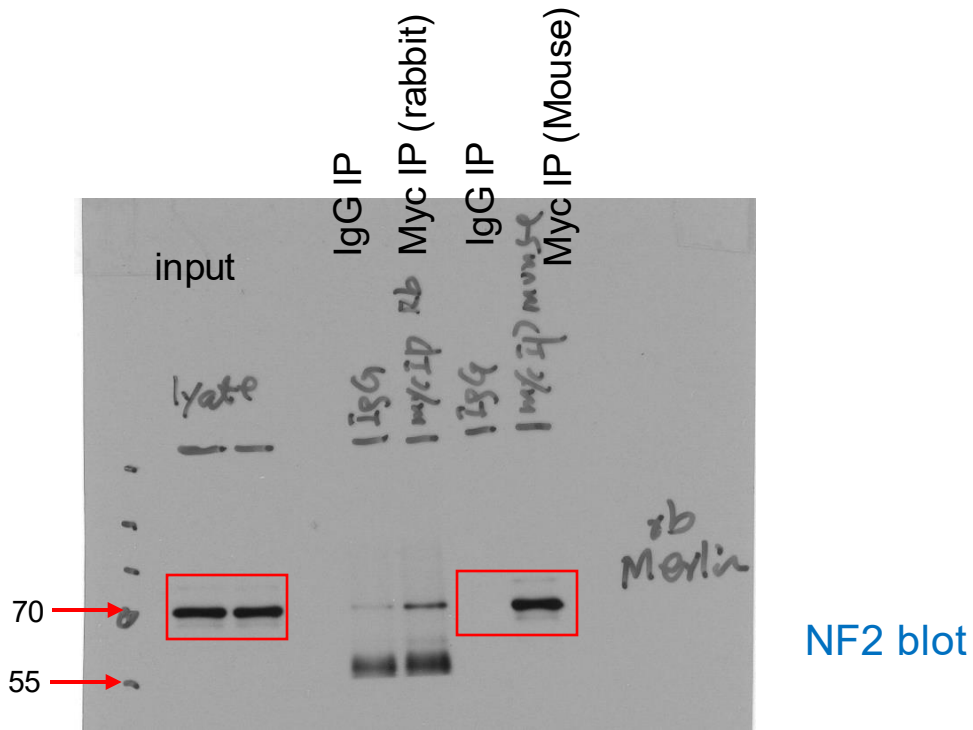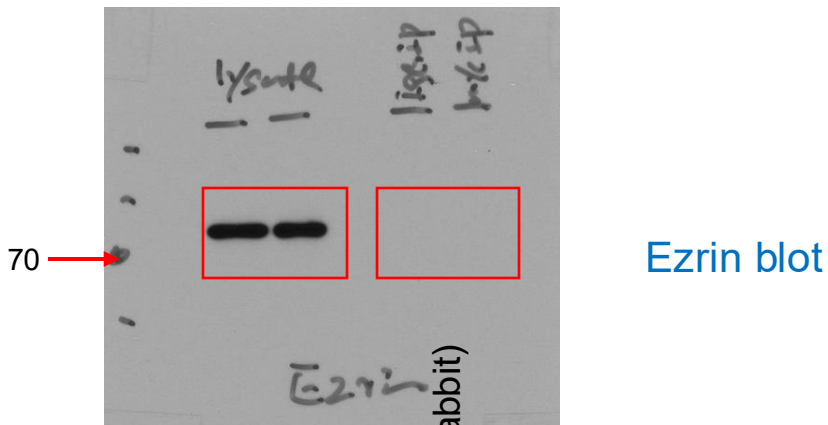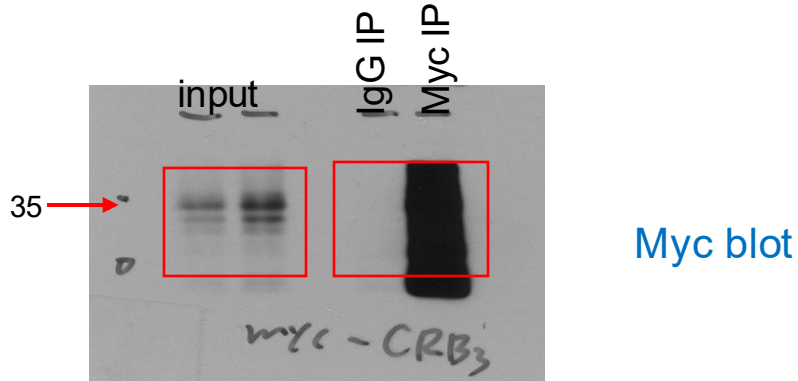

# Full unedited blot for Figure 7c

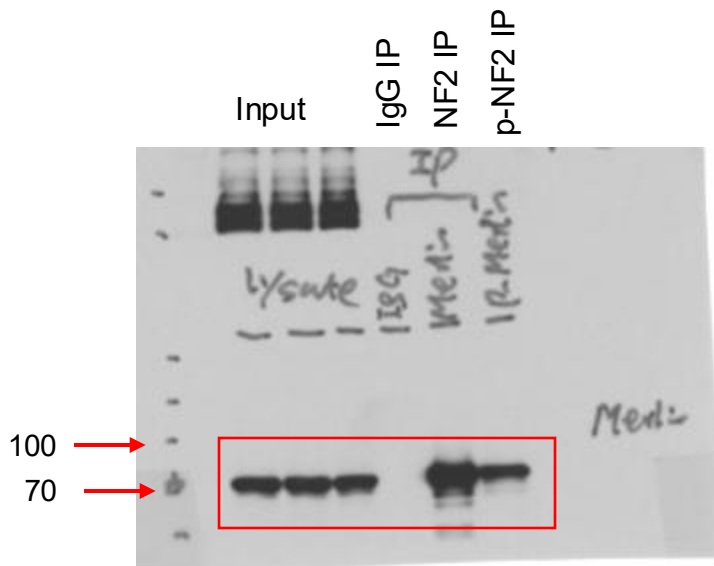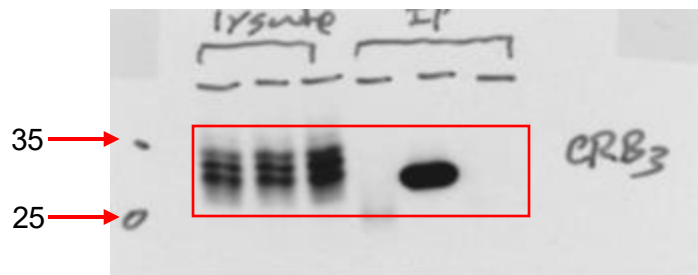

# Full unedited blot for Figure 7e

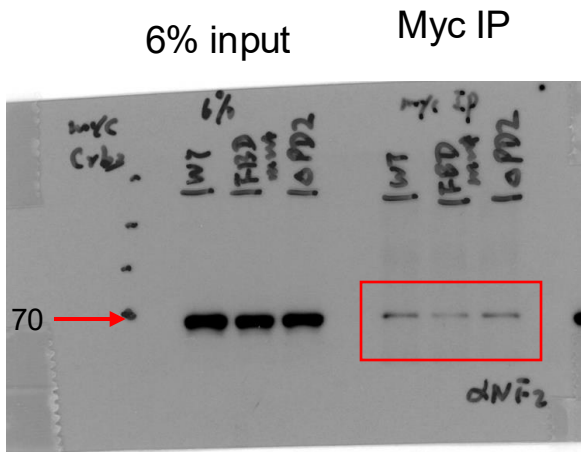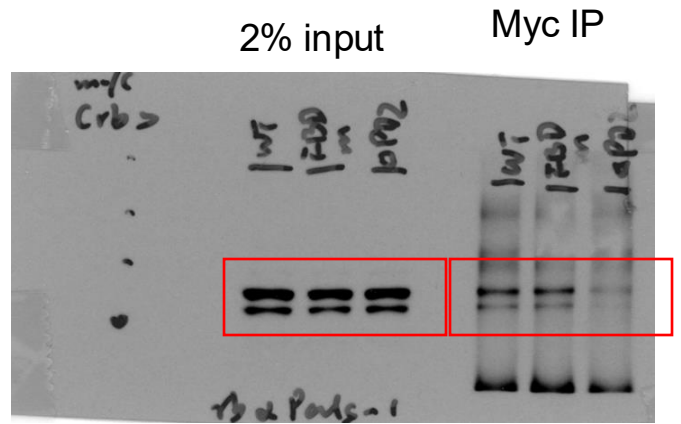

PALS1 blot

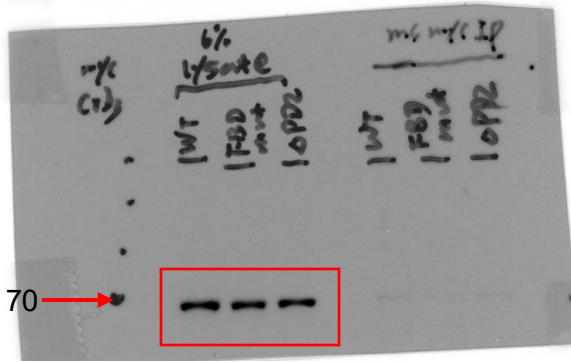

NF2 blot

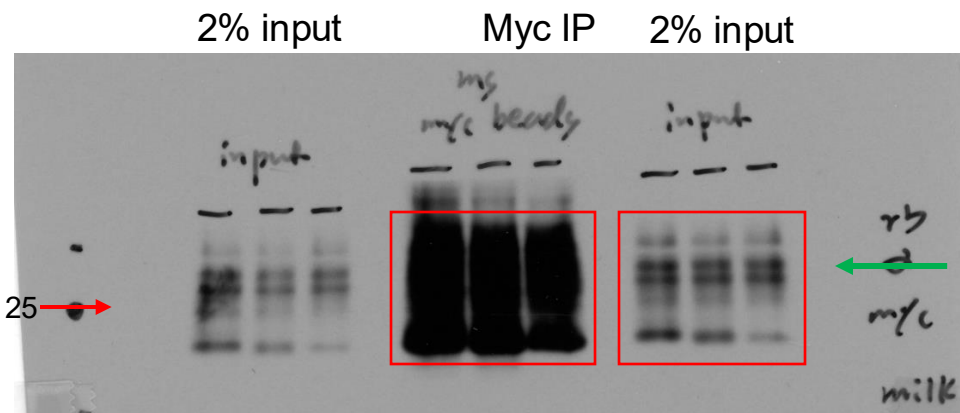

Myc blot

# Full unedited blot for Figure 8

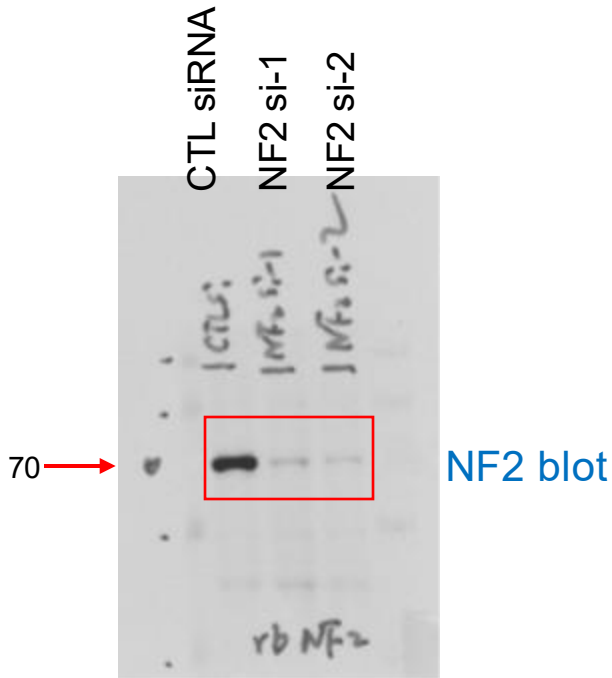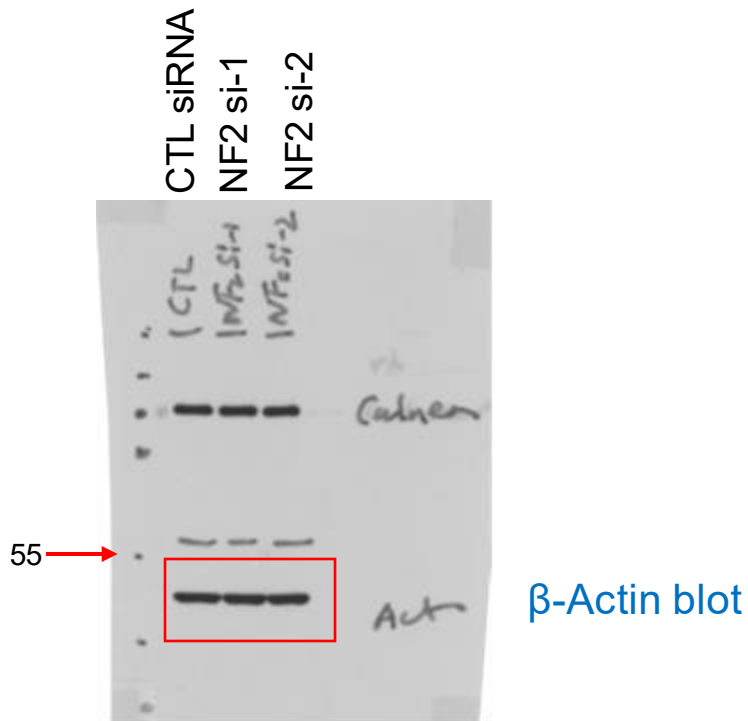

# Full unedited blot for Supplemental Figure 1b

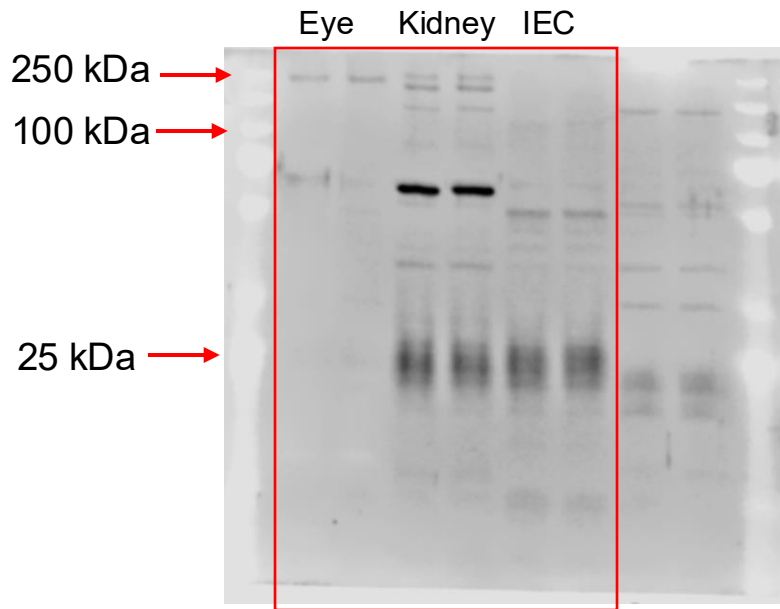

Crb3a blot

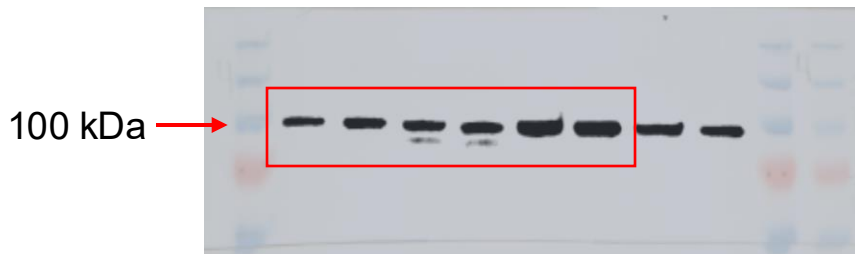

Calnexin blot

# Full unedited blot for Supplemental Figure 6a

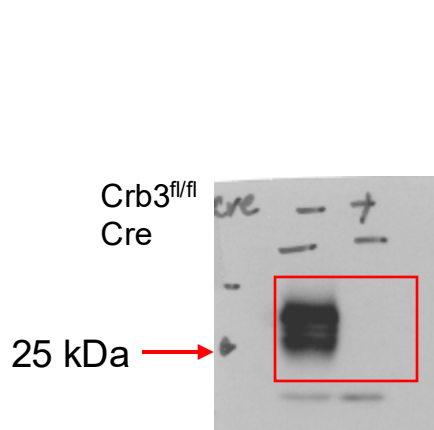

Crb3a blot

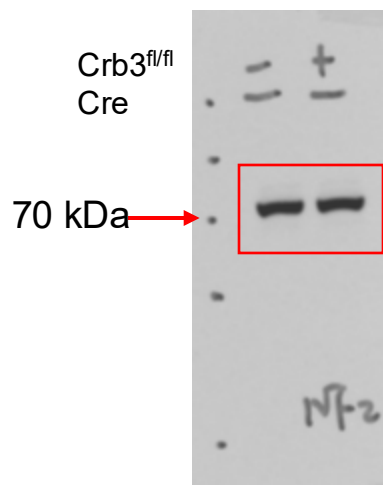

NF2 blot

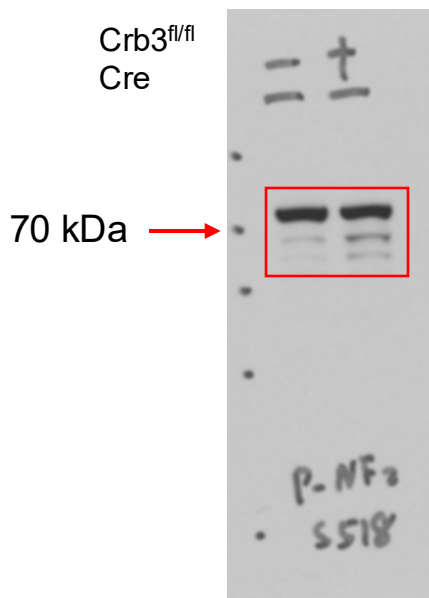

p-NF2 S518 blot

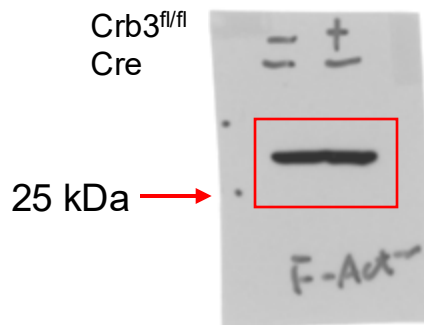

$\beta$ -Actin blot
